# Supplementary material for: Clinical findings of Talaromyces marneffei infection among patients with anti-interferon-γ immunodeficiency: a prospective cohort study
Source: Research Square preprint supplement (doi:10.21203/rs.3.rs-494898/v1), 2021-05-14
Supplement: Supplementary file 1 [file 9f77ba9b0f2f36d49d9ff4d1.docx]

**Table 1. Baseline characteristicsof the participants**

| Variable | Group 1 | Group 2 | Group 3 | Group 4 | *P v*alue |
| --- | --- | --- | --- | --- | --- |
| (N=42) | (N=20) | (N=20) | (N=40) |
| Age, years | 53 (33, 59) | 55 (32, 65) | 51 (37, 56) | 32 (27, 38) | 0.646 |
| Male sex, no. (%) | 27 (64.3%) | 5 (35.0%) | 8 (40.0%) | 18 (45.0%) | 0.094 |
| Anti-IFN-γ antibody-positive,  no. (%) | 22 (52.4%) | 7 (35.0%) | 2 (10.0%) | 0 | 0.015 |
| Anti-IFN-γ antibody titer (ng/ml) | 661.33 (334.88, 941.29) | 496.17 (418.11, 672.54) | 346.24 (304.32, 394.98) | 353.97 (277.40, 422.38) | <0.001 |

**Table 2. Comparison of clinical characteristics between group 1P and group 1N during the first visit**

| Variable | Group 1P | Group 1N | *P value* |
| --- | --- | --- | --- |
| (N=22) | (N=20) |
| Age, years | 52.0 (34.8, 58.0) | 54.5 (29.0, 63.8) | 0.734 |
| Male sex, no. (%) | 14 (63.6%) | 13 (65.0%) | 1.0 |
| Anti-IFN-γ antibody titer (ng/ml) | 926.31 (760.02, 2103.20) | 332.40 (243.51,491.89) | ＜0.001 |
| Time from symptom onset to diagnosis | 149.5 (57.2, 272.3) | 98.5 (22.3,154.5) | 0.107 |
| **Coexisting respiratory disease,** **no. (%)** | 3 (13.6%) | 10 (50.0%) | 0.019 |
| Bronchiolitis | 0 | 4 (20.0%) | 0.043 |
| COPD | 2 (9.1%) | 4 (20.0%) | 0.400 |
| COPD with bronchiectasis | 0 | 2 (10.0%) | 0.221 |
| Asthma | 1 (4.5%) | 0 | 0.476 |
| **Extrapulmonary organ involvement, no. (%)** | 18 (81.8%) | 11 (55.0%) | 0.096 |
| Skin | 10 (45.5%) | 3 (15.0%) | 0.047 |
| Lymph node | 18 (81.8%) | 11 (55.0%) | 0.096 |
| Liver | 2 (9.1%) | 1 (5.0%) | 1.000 |
| Spleen | 2 (9.1%) | 0 | 0.489 |
| Bone | 9 (40.9%) | 1 (5.0%) | 0.010 |
| **Symptoms, no. (%)** |  |  |  |
| Fever | 12 (54.5%) | 6 (30.0%) | 0.131 |
| Cough | 17 (77.3%) | 17 (85.0%) | 0.700 |
| Sputum production | 14 (63.6%) | 15 (75.0%) | 0.514 |
| Hemoptysis | 4 (18.2%) | 3 (15.0%) | 1.0 |
| Dyspnea | 6 (27.3%) | 3 (15%) | 0.460 |
| Chest pain | 9 (40.9%) | 6 (30.0%) | 0.531 |
| Osteodynia/Arthralgia | 7 (31.8%) | 3 (15.0%) | 0.284 |
| Wasting | 13 (59.0%) | 10 (50.0%) | 0.757 |
| Moist rales | 6 (27.3%) | 8 (40.0%) | 0.515 |
| Pleural effusion | 13 (59.1%) | 3 (15.0%) | 0.005 |

COPD=chronic obstructive pulmonary disease

**Group 1P=** anti-IFN-γ autoantibody-positive group

**Group 1N=** anti-IFN-γ autoantibody-negative group

**Table 3. Comparison of laboratory findings between group 1P and group 1N during the first visit**

| Variable | Group 1P | Group 1N | *P value* |
| --- | --- | --- | --- |
| (N=22) | (N=20) |
| White cell count (*109 cells/L) | 13.4 (9.3, 18.0) | 7.7 (5.8, 12.0) | 0.012 |
| Absolute neutrophil count  (*109 cells/L) | 10.7 (6.9, 13.3) | 5.1 (3.6, 11.4) | 0.019 |
| Neutrophil ratio (neut %) | 0.76 (0.7, 0.9) | 0.7(0.6, 0.8) | 0.120 |
| Eosinophil count (*109 cells/L) | 0.4 (0.1, 0.6) | 0.1 (0.1, 0.3) | 0.030 |
| Hemoglobin (g/L) | 89.7 (69.0,123.8) | 111.0 (93.8,129.8) | 0.049 |
| Platelet count (*109 cells/L) | 310.5 (226.2,485.7) | 312.0 (189.0,408.0) | 0.569 |
| Erythrocyte sedimentation rate (mm/h)* | 98.0 (72.0, 102.0) | 52.0 (15.9, 88.0) | 0.008 |
| C-reactive protein (mg/dL)† | 7.7 (3.3, 15.7) | 72.5 (14.9, 137.2) | 0.002 |
| **Immunoglobulin**‡ |  |  |  |
| Ig G (g/L) | 28.7 (17.5, 34.0) | 17.7 (13.7, 25.8) | 0.026 |
| Ig A (g/L) | 1.1 (0.8,1.5) | 1.2 (0.9,2.2) | 0.400 |
| Ig M (g/L) | 2.6 (1.5, 2.8) | 2.2 (1.5,2.9) | 0.880 |
| **T cell count**§ |  |  |  |
| CD3+ T cell count (cells/µl) | 1425.0 (109.1, 1945.0) | 830.5 (355.5,1302.3) | 0.011 |
| CD4+ T cell count (cells/µl) | 685.0 (419.0, 965.5) | 433.0 (111.3,844.5) | 0.247 |
| CD8+ T cell count (cells/µl) | 631.0 (499.0, 1132.0) | 333.5 (151.0, 467.0) | ＜0.001 |

*Erythrocyte sedimentation rate data were missing for 8 patients (19%).

†C-reactive protein data were missing for 12 patients (28.5%).

‡Immunoglobulin data were missing for 10 patients (23.8%).

§T cell count data were missing for 17 patients (40.5%).

**Group 1P=** anti-IFN-γ autoantibody-positive group

**Group 1N=** anti-IFN-γ autoantibody-negative group

**Table 4. Multivariate logistic regression analysis of factors associated with the appearance of anti-IFN-γ autoantibody positivity**

| Variable | Univariable OR  (95% CI) | *P value* | Multivariable  OR (95% CI) | *P value* |
| --- | --- | --- | --- | --- |
| White-cell count (*109 cells/L) | 1.134 (1.007, 1.277) | 0.038 | 1.035 (0.906, 1.183) | 0.610 |
| Hemoglobin (g/L) | 0.973 (0.947, 1.001) | 0.057 | 0.985 (0.948, 1.024) | 0.454 |
| Coexisting respiratory disease | **0.158 (0.035, 0.708)** | **0.016** | **0.094 (0.011, 0.809)** | **0.031** |
| Pleural effusion | **8.185 (1.839, 36.424)** | **0.006** | **11.162 (1.517, 82.164)** | **0.018** |
| Extrapulmonary organ involvement | 3.682 (0.911, 14.876) | 0.067 | 0.469 (0.046, 4.834) | 0.525 |

OR= odds ratio, CI=confidence interval
